# Supplementary material for: Synthesis of graphene/Ni–Al layered double hydroxide nanowires and their application as an electrode material for supercapacitors
Source: Royal Society of Chemistry journal article supplement (doi:10.1039/c3ta14613h), 2014-01-01
Supplement: c3ta14613h.pdf [file c3ta14613h.pdf]

Electronic Supporting Information to:

## Synthesis of graphene/Ni-Al layered double hydroxide nanowires and their application as electrode material for supercapacitors

Jamil Memon,<sup>a,b,†</sup> Jinhua Sun,<sup>a,†</sup> Dongli Meng,<sup>a</sup> Wenzhu Ouyang,<sup>a</sup> Mushtaque A. Memon,<sup>a,b</sup> Yong Huang,<sup>a</sup> Shouke Yan,<sup>b</sup> Jianxin Geng<sup>a,\*</sup>

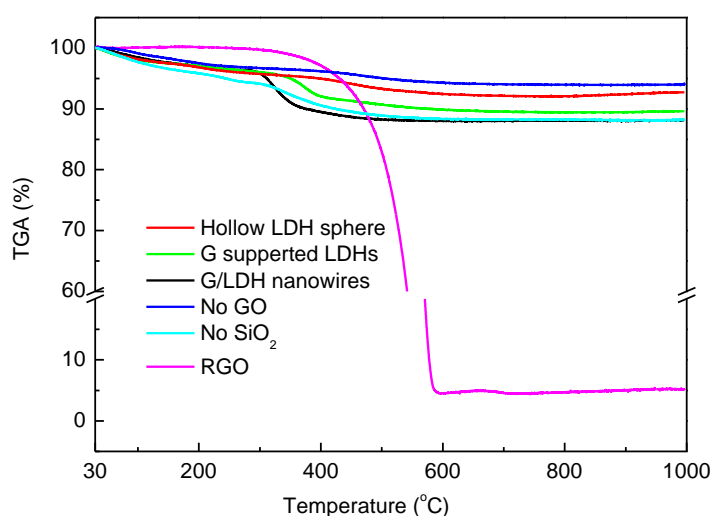

**Figure S1.** TGA curves of hollow Ni-Al LDH spheres, graphene supported Ni-Al LDHs, graphene/Ni-Al LDH nanowires, graphene/Ni-Al LDH composite synthesized without using GO, graphene/Ni-Al LDH composite synthesized without using SiO<sub>2</sub>, and RGO.

**Table S1.** The electrical conductivity of the different forms of Ni-Al LDH materials.

| Materials                     | Hollow Ni-Al LDH spheres | Graphene supported Ni-Al LDHs | Graphene/ Ni-Al LDH nanowires | No GO                 | No SiO <sub>2</sub>   | RGO  |
|-------------------------------|--------------------------|-------------------------------|-------------------------------|-----------------------|-----------------------|------|
| Electrical conductivity (S/m) | $2.98 \times 10^{-8}$    | $1.26 \times 10^{-4}$         | 1.84                          | $1.13 \times 10^{-5}$ | $1.46 \times 10^{-2}$ | 0.38 |

**Table S2.** The surface area of the different forms of Ni-Al LDH materials.

| Materials                        | Hollow Ni-Al LDH spheres | Graphene supported Ni-Al LDHs | Graphene/ Ni-Al LDH nanowires | No GO | No SiO <sub>2</sub> | RGO |
|----------------------------------|--------------------------|-------------------------------|-------------------------------|-------|---------------------|-----|
| Surface area (m <sup>2</sup> /g) | 201                      | 77                            | 230                           | 127   | 242                 | 212 |

**Table S3.** The specific capacitance for graphene/Ni-Al LDH nanowires at different current densities.

|                            |      |     |     |     |     |
|----------------------------|------|-----|-----|-----|-----|
| Current density (A/g)      | 0.43 | 0.7 | 2.1 | 3.6 | 7.1 |
| Specific capacitance (F/g) | 268  | 120 | 112 | 114 | 117 |
